# Supplementary material for: A Chebyshev Spectral Method with Null Space Approach for Boundary‐Value Problems of Euler‐Bernoulli Beam
Source: Hindawi journal article supplement (doi:10.1155/2018/2487697), 2018-01-01
Supplement: f1 [file 2487697.f1.zip]

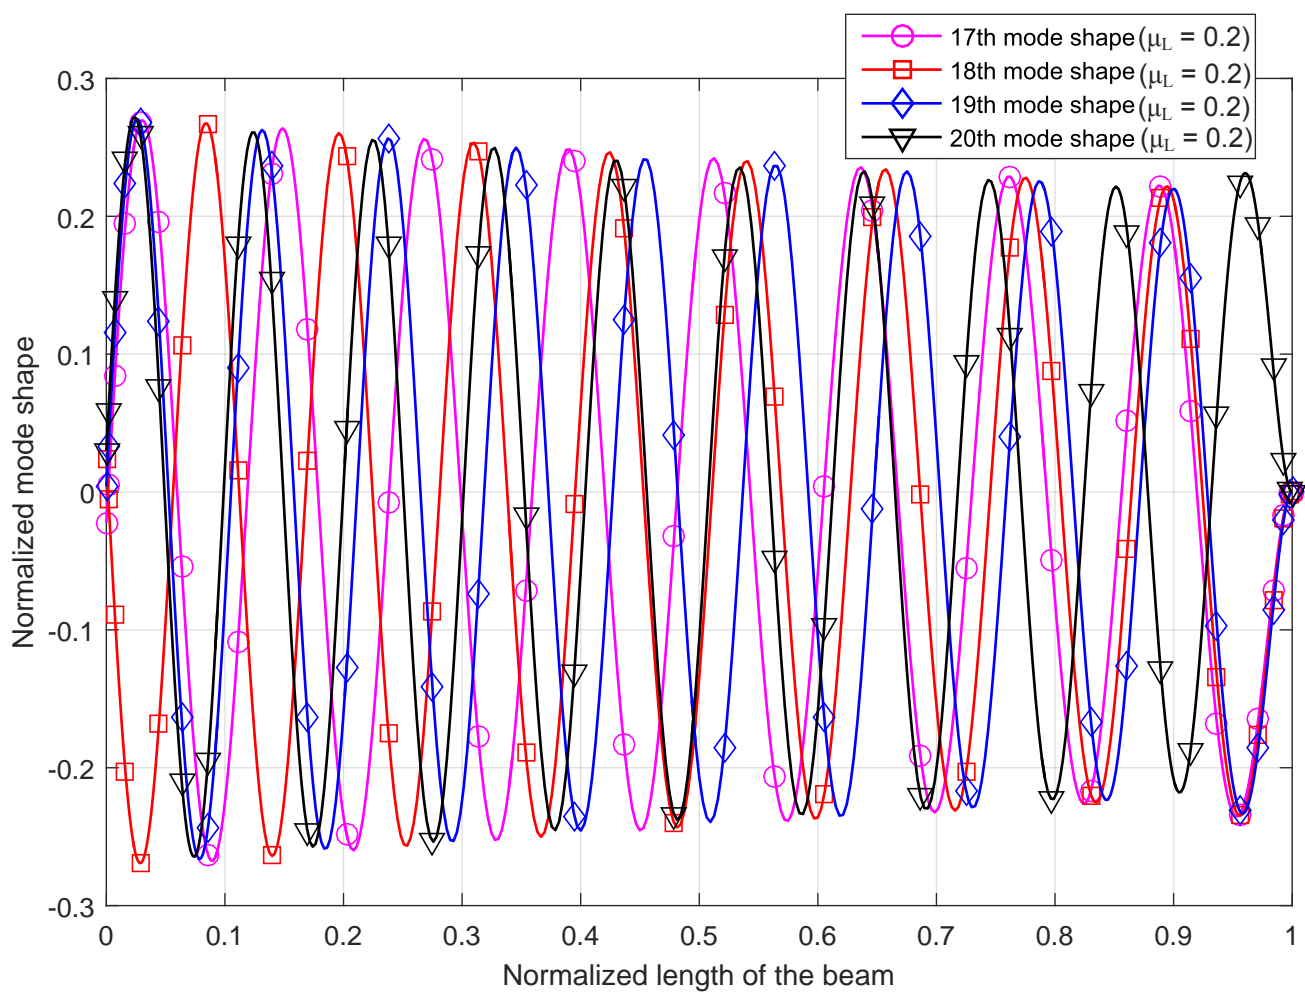

FIGURE 8\_S: The 17th-20th normalized mode shapes of FIGURE 8 ( $\mu_L=0.2$ ).

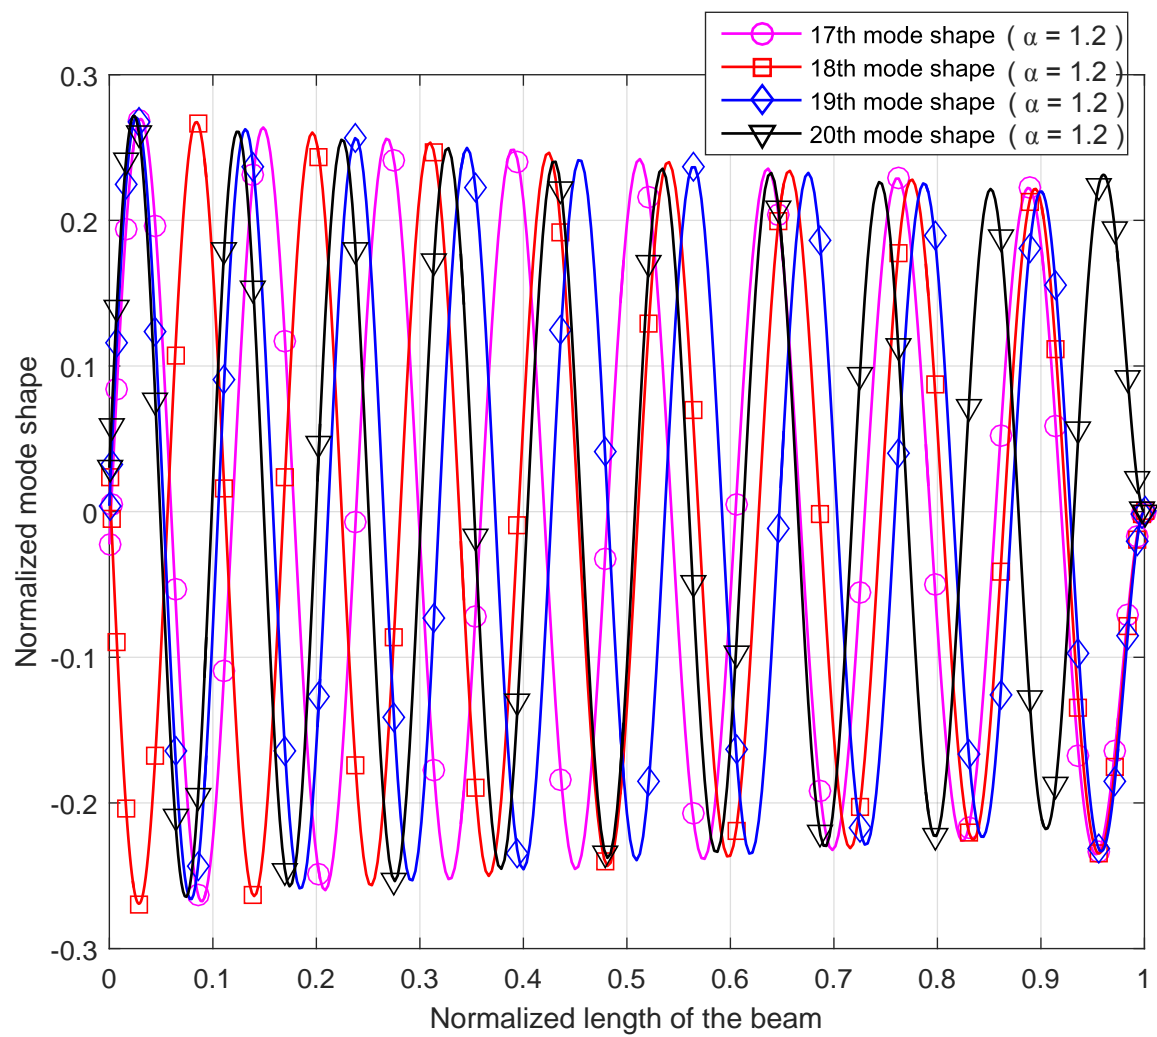

FIGURE 9\_S: The 17th-20th normalized mode shapes of FIGURE 9 ( $\alpha = 1.2$ ).

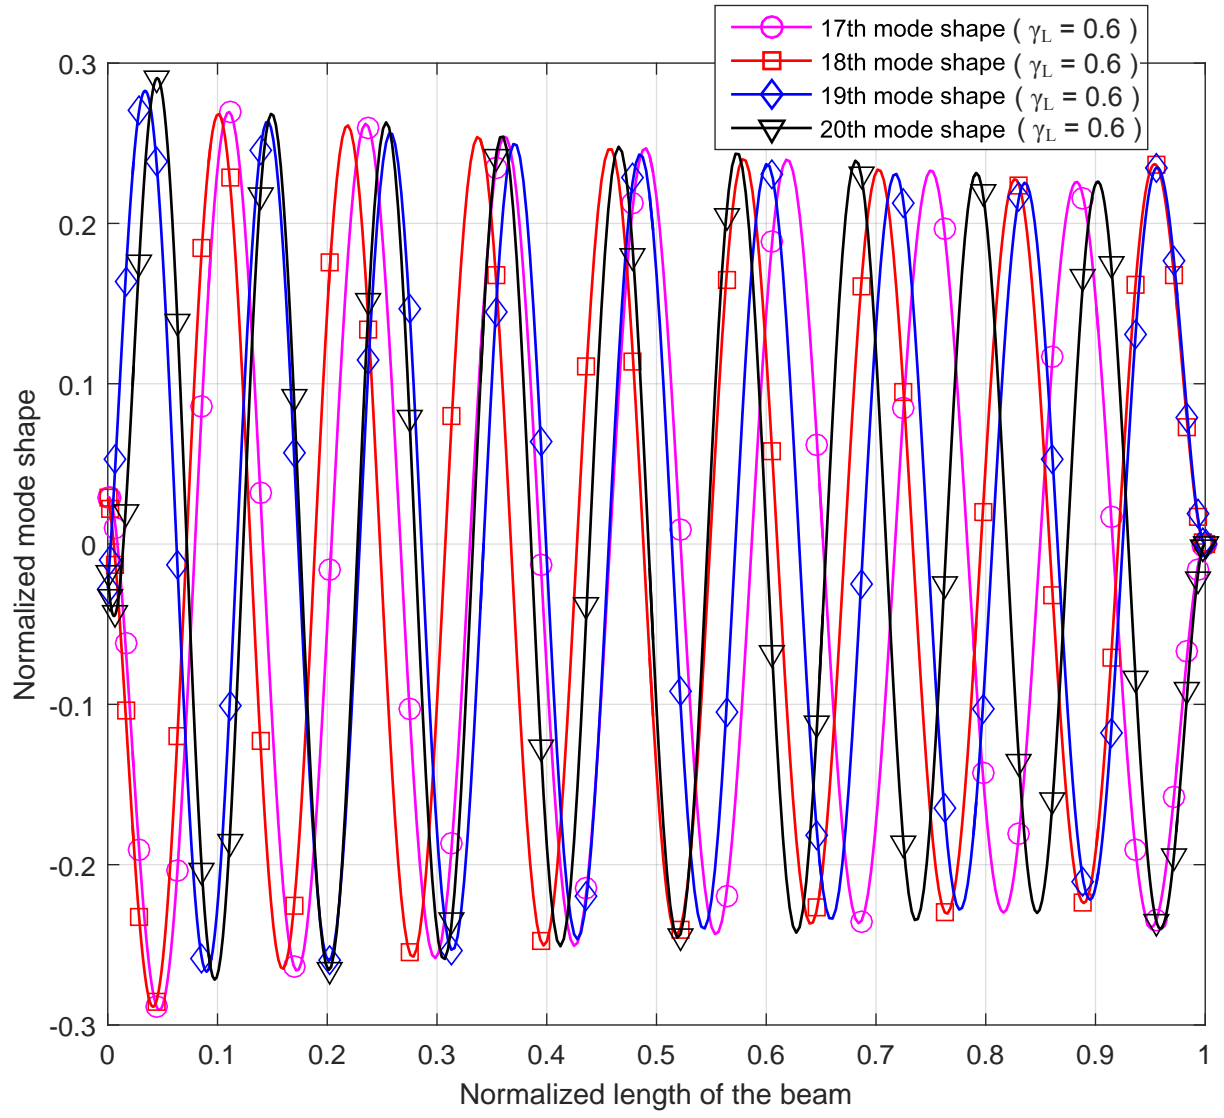

FIGURE 10\_S: The 17th-20th normalized mode shapes of FIGURE 10 ( $\gamma_L=0.6$ ).

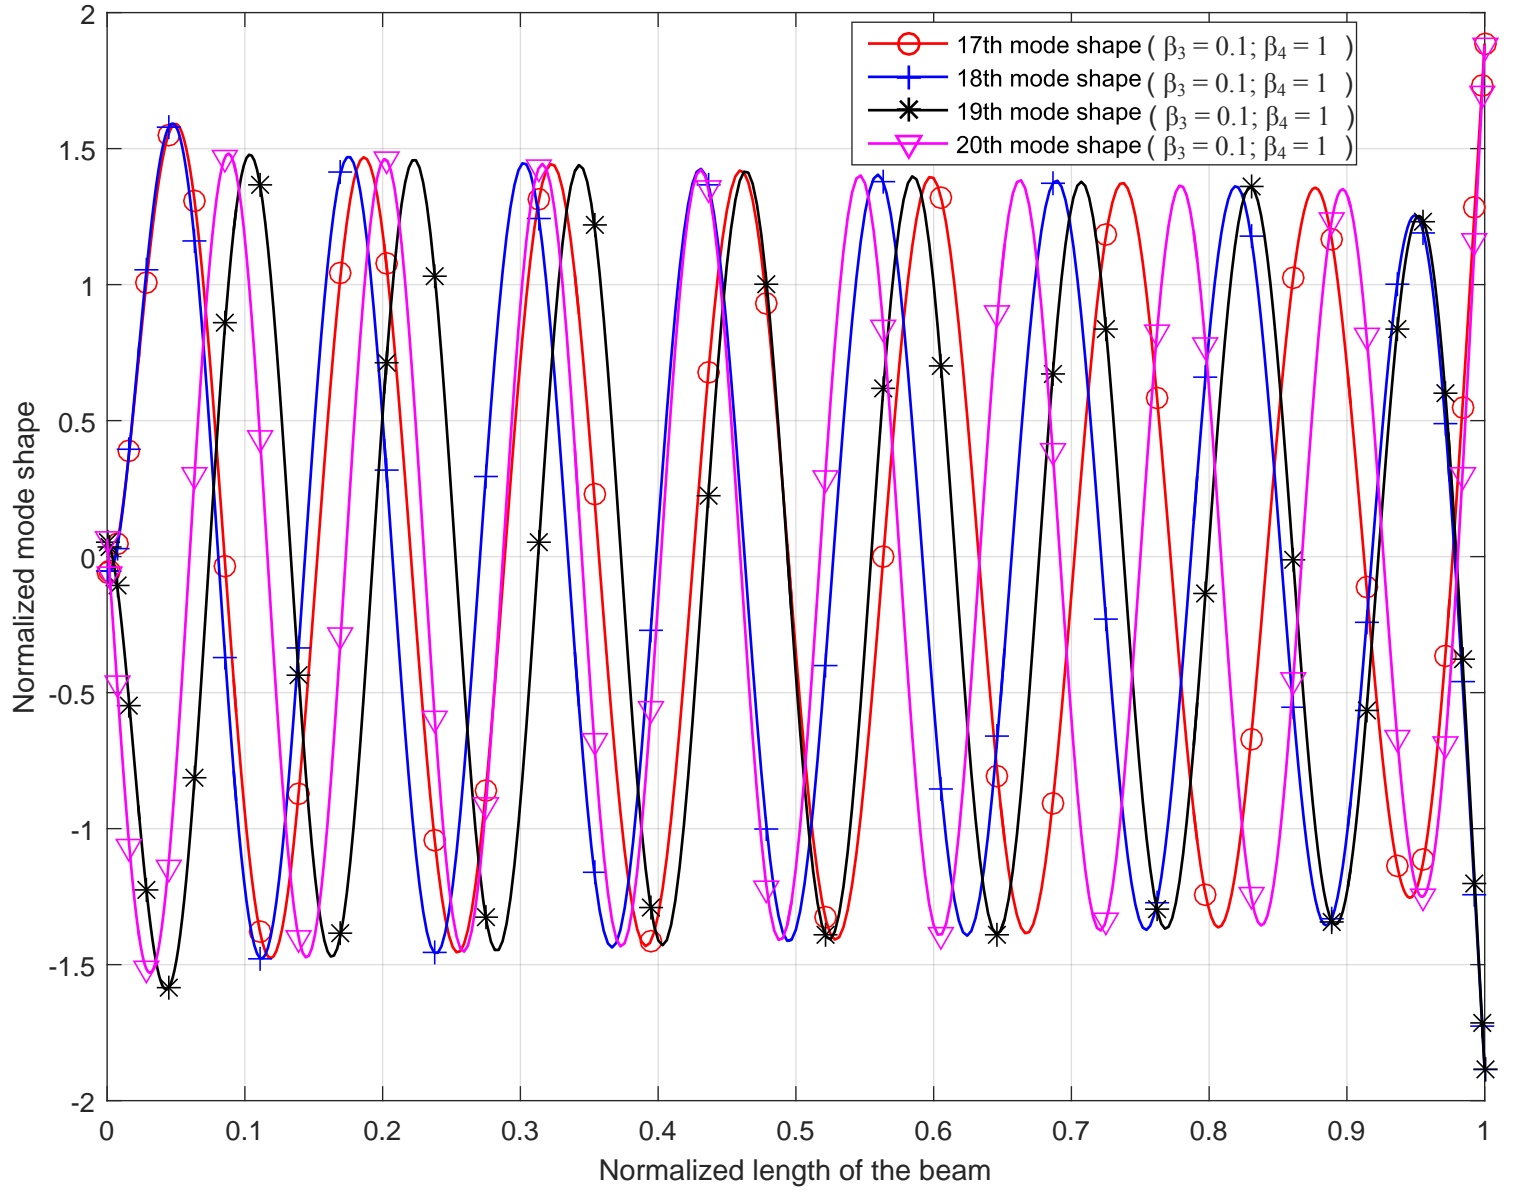

FIGURE 11\_S: The 17th-20th normalized mode shapes of FIGURE 11 ( $\beta_3 = 0.1; \beta_4 = 1$  ).

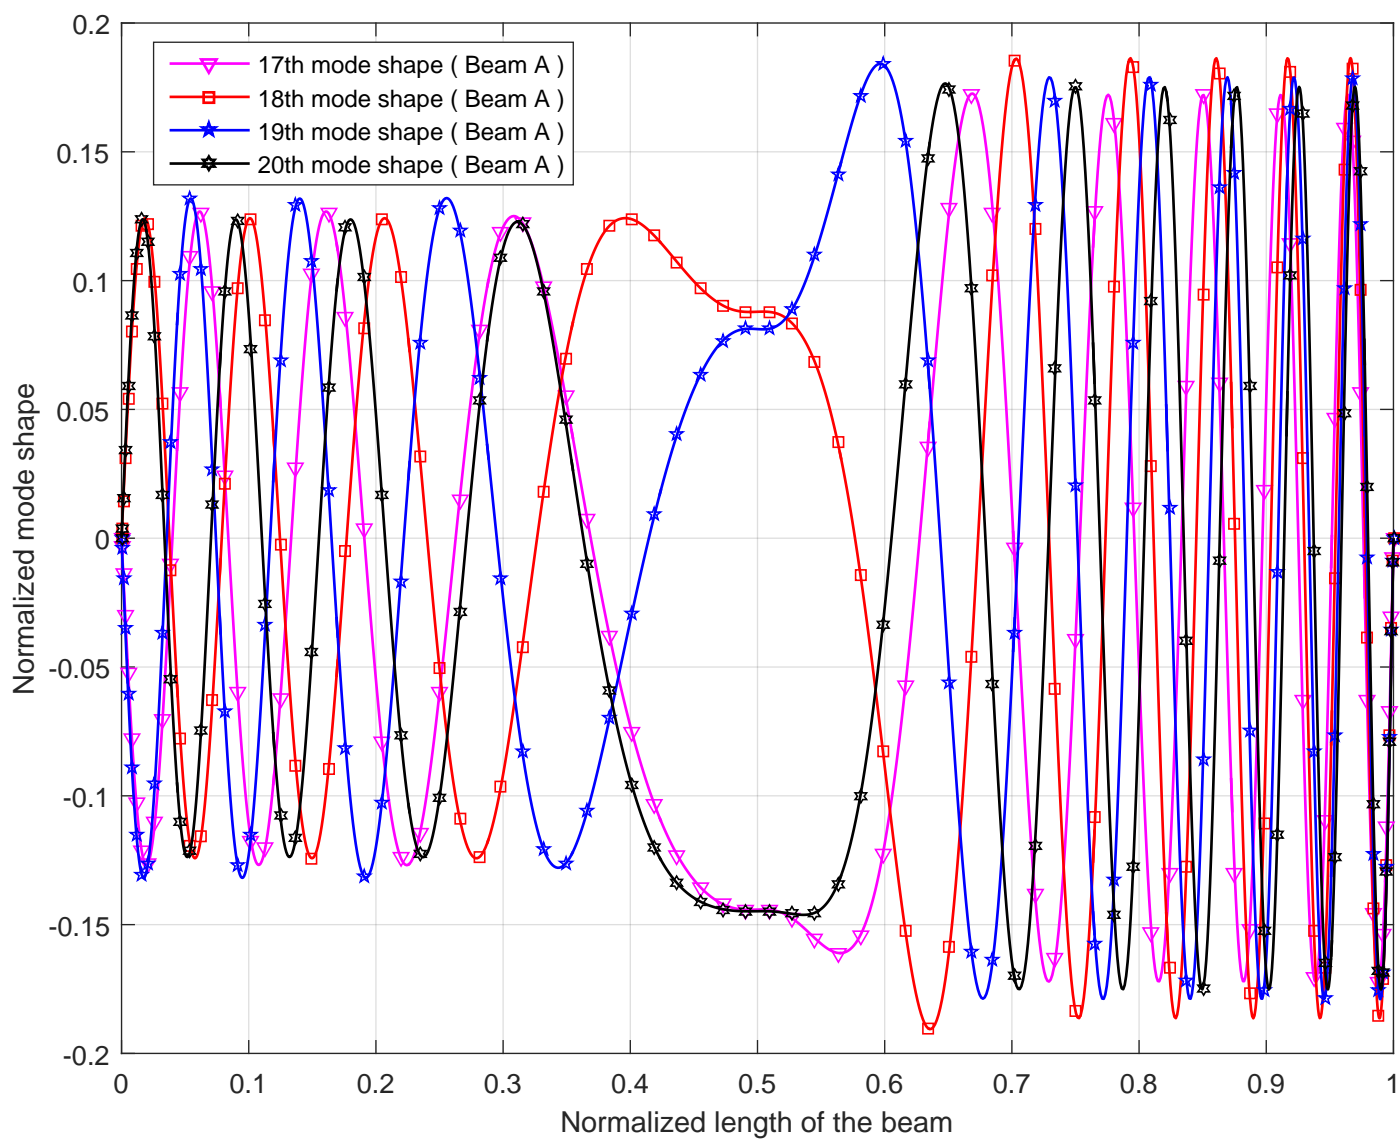

FIGURE 13\_S: The 17th-20th normalized mode shapes of FIGURE 13 (Beam A).

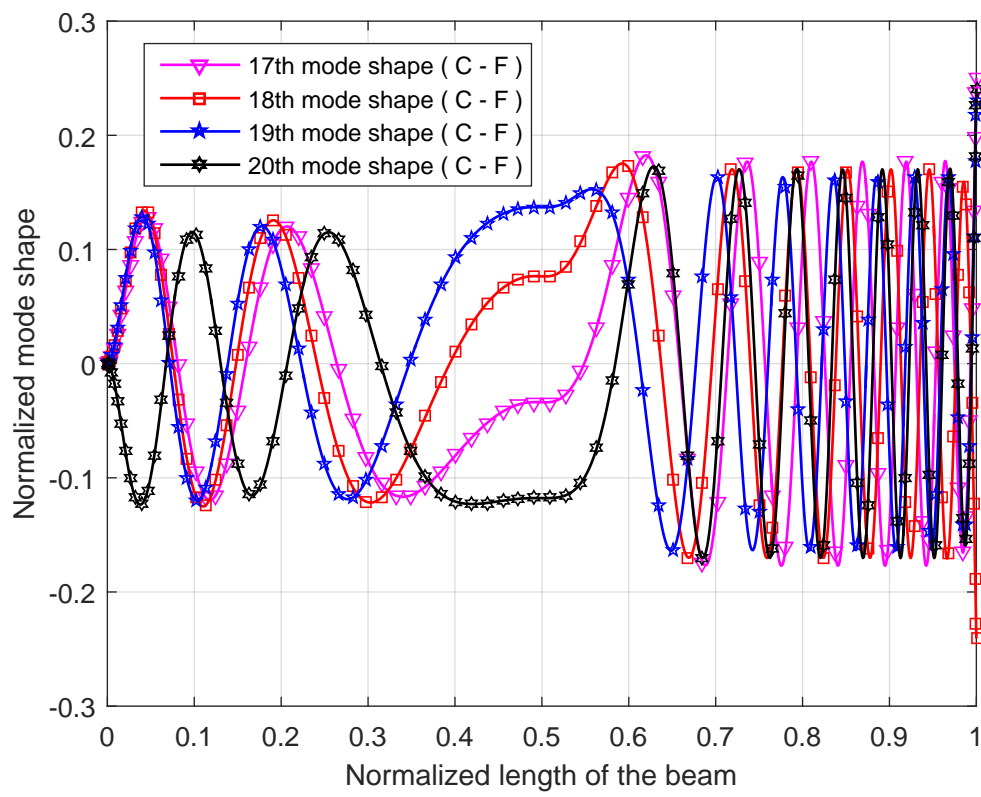

FIGURE 14\_S: The 17th-20th normalized mode shapes of FIGURE 14 (C - F).

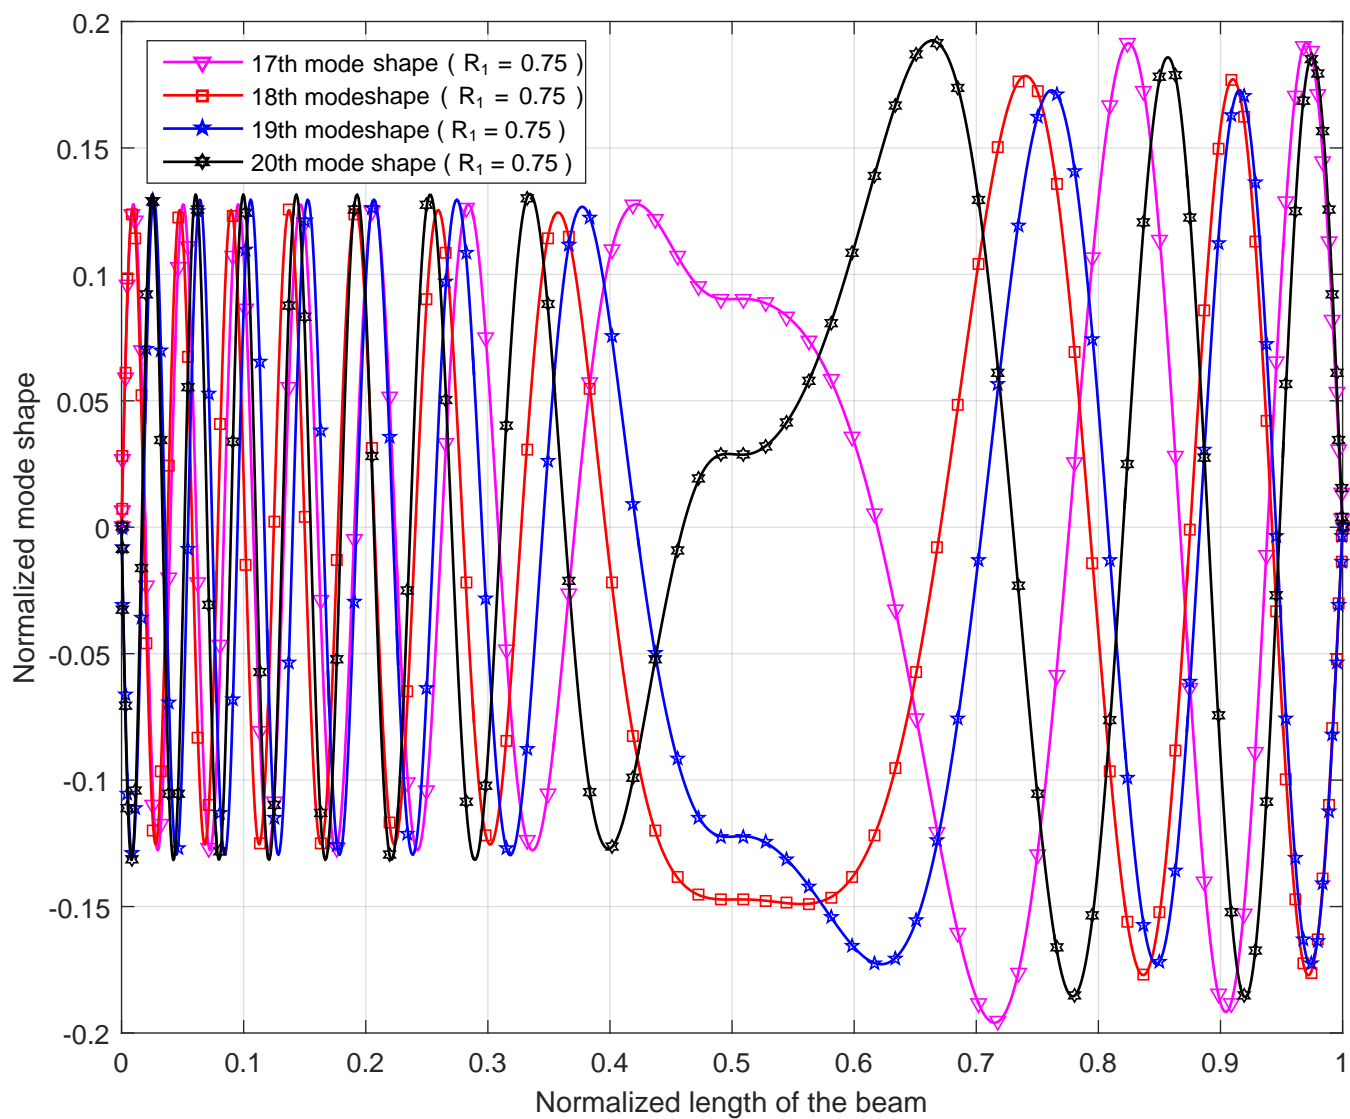

FIGURE 15\_S: The 17th-20th normalized mode shapes of FIGURE 15 ( $R_1 = 0.75$ ).

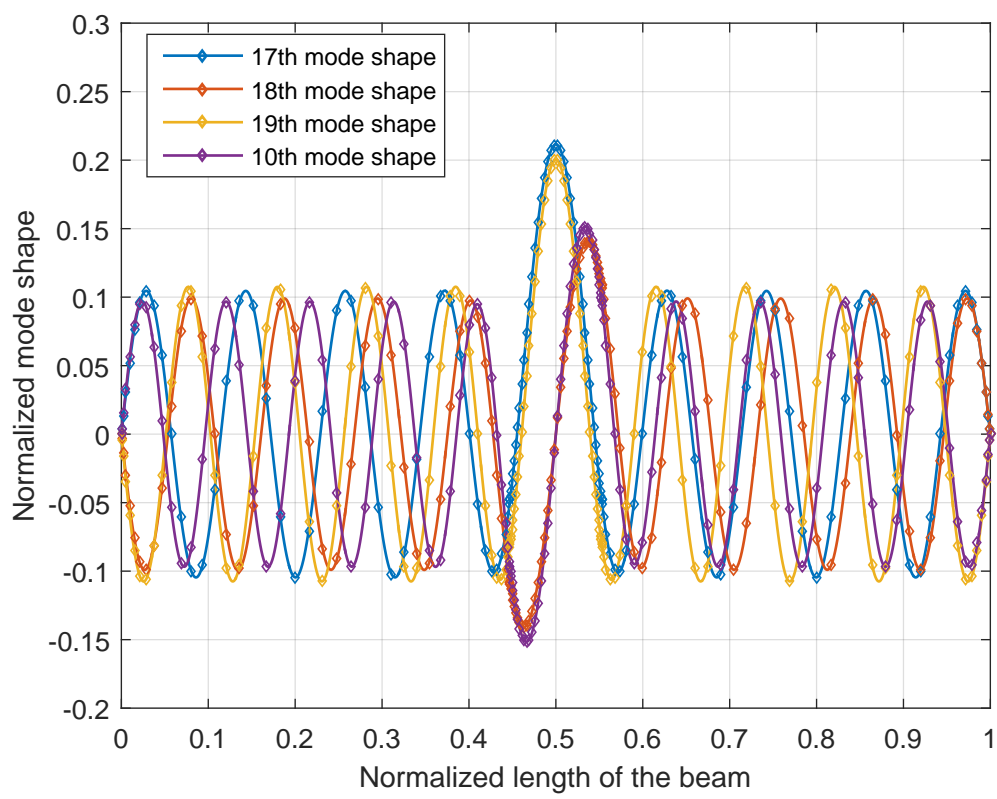

FIGURE 17\_S: The 17th-20th normalized mode shapes of FIGURE 17 .
