# Supplementary material for: A Chebyshev Spectral Method with Null Space Approach for Boundary‐Value Problems of Euler‐Bernoulli Beam
Source: Hindawi journal article supplement (doi:10.1155/2018/2487697), 2018-01-01
Supplement: f1 [file 2487697.f1.zip]

Archive with 3 entries (2 files):
- 2487697.f1/
- 2487697.f1/2487697.f1.pdf
- 2487697.f1/2487697.f2.m
